# Supplementary material for: Preparation and photocatalytic activity of ZnGa2O4-β-Ga2O3 thin films
Source: Royal Society of Chemistry journal article supplement (doi:10.1039/d2ma01016j), 2023-01-01
Supplement: d2ma01016j1.pdf [file d2ma01016j1.pdf]

## Photocatalytic behavior of Zinc gallate and N-doped Zinc gallate thin films

Premrudee Promdet<sup>a</sup>, Claire J. Carmalt<sup>a</sup> and Ivan P. Parkin<sup>a\*</sup>

<sup>a</sup> Materials Chemistry Centre, Department of Chemistry, University College London, 20 Gordon Street, London WC1H 0AJ, UK

Fax: (+44) 20-7679-7463

E-mail: [i.p.parkin@ucl.ac.uk](mailto:i.p.parkin@ucl.ac.uk)

### Supporting Information

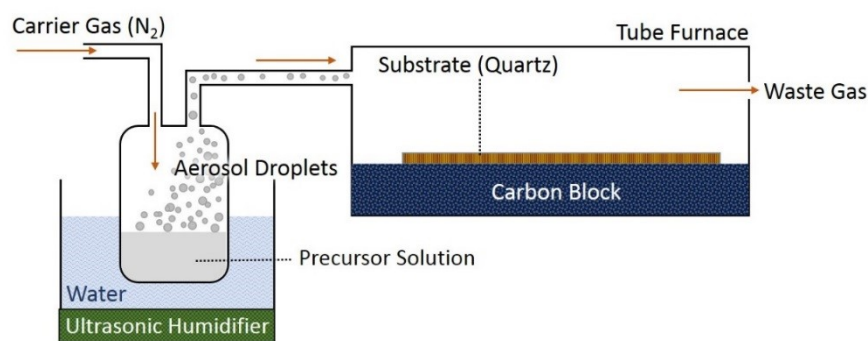

**Fig. S1** The illustration of principle of AACVD operation used for zinc gallate deposition.

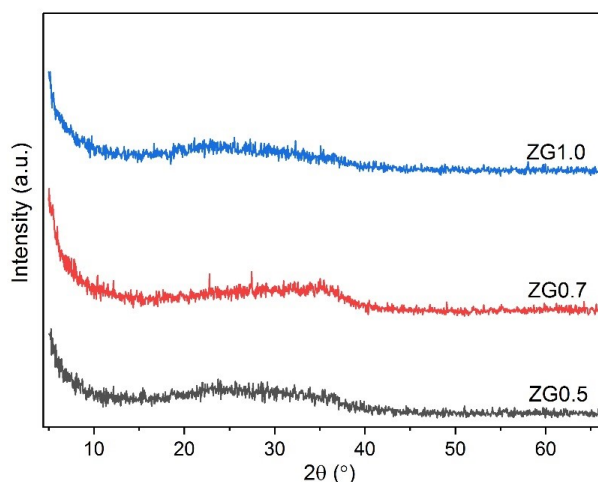

**Fig. S2** XRD patterns of amorphous thin films of **ZG1.0**, **ZG0.7**, and **ZG0.5**, prepared by AACVD method at different mole ratios between Zn/Ga in the precursor mixture of 1, 0.7, and 0.5, respectively, which the films at 400 °C by AACVD.

**Table S1** Energy separation between the Zn 2p<sub>3/2</sub> and Ga 2p<sub>3/2</sub> peaks of amorphous thin film

| Sample         | Ga(2p <sub>3/2</sub> ) - Zn(2p <sub>3/2</sub> ) (energy separation) (eV) |                 |
|----------------|--------------------------------------------------------------------------|-----------------|
|                | Before annealing                                                         | After annealing |
| <b>ZG-0.45</b> | 96.2                                                                     | 96.1            |
| <b>ZG-0.26</b> | 96.2                                                                     | 96.2            |
| <b>ZG-0.17</b> | 96.1                                                                     | 96.2            |

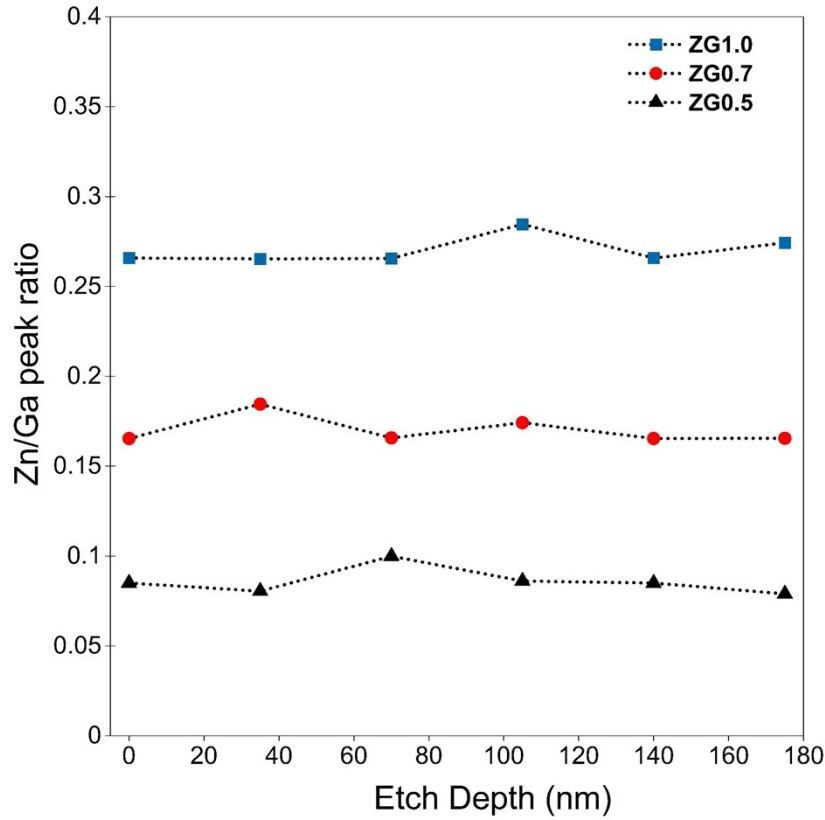

**Fig. S3** Mole ratio between Zn/Ga profiled by a JEOL6301 XPS instrument of as-deposited samples (**ZG-0.45**, **ZG-0.26** and **ZG-0.17**, respectively) deposited by AACVD method at different mole ratios between Zn/Ga in the precursor mixture of 1, 0.7 and 0.5, respectively
